# Supplementary material for: Interaction of Clostridium perfringens Epsilon Toxin with the Plasma Membrane: The Role of Amino Acids Y42, Y43 and H162
Source: MDPI journal article supplement (doi:10.3390/toxins14110757), 2022-11-03
Supplement: s1 [file s1]

## Supplementary Materials: Interaction of *Clostridium perfringens* Epsilon Toxin with The Plasma Membrane: The Role of Amino Acids Y42, Y43 and H162

Skye Marshall, Beth McGill, Helen Morcrette, C. Peter Winlove, Catalin ChimereI, Peter G. Petrov and Monika Bokori-Brown

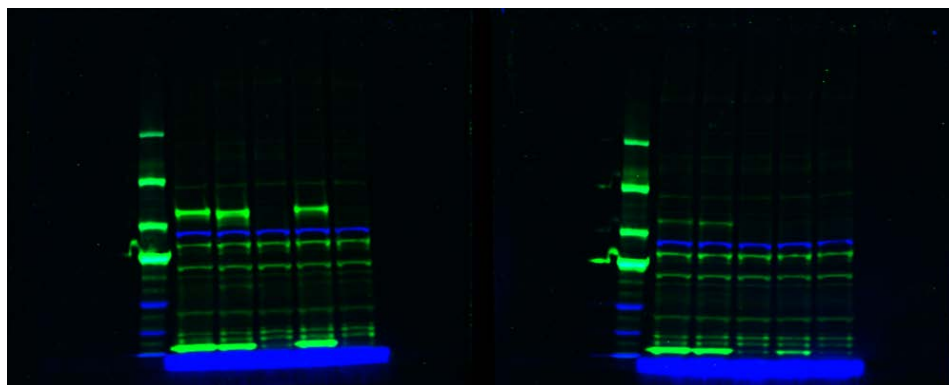

**Figure S1.** Western blot analysis of SDS-resistant Etx oligomers in CHO-hMAL cells.

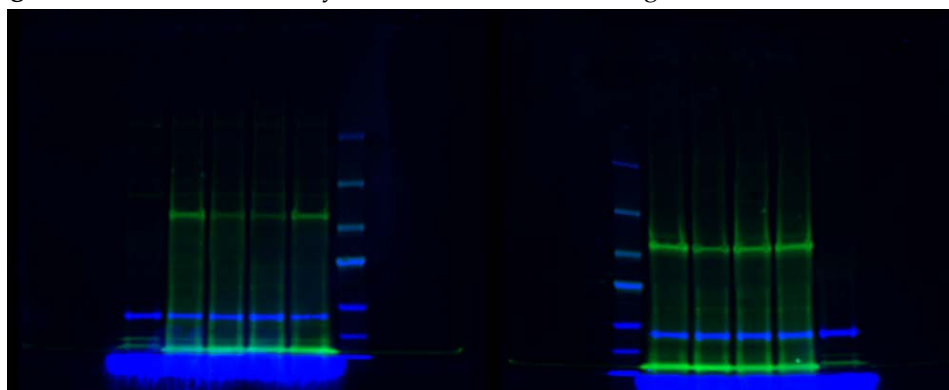

**Figure S2.** Western blot analysis of SDS-resistant Etx oligomers in hRBCs.
